# Supplementary material for: In Vivo6-([18F]Fluoroacetamido)-1-hexanoicanilide PET Imaging of Altered Histone Deacetylase Activity in Chemotherapy-Induced Neurotoxicity
Source: Hindawi journal article supplement (doi:10.1155/2018/3612027), 2018-01-01

**Male athymic  
nude mice**

**Cisplatin/SAHA  
combination injection**

**[<sup>18</sup>F]FAHA or [<sup>18</sup>F]FDG  
PET/CT imaging**

**Behavior tests**

**Immunohistochemistry  
validation**

**Data analysis &  
interpretation**

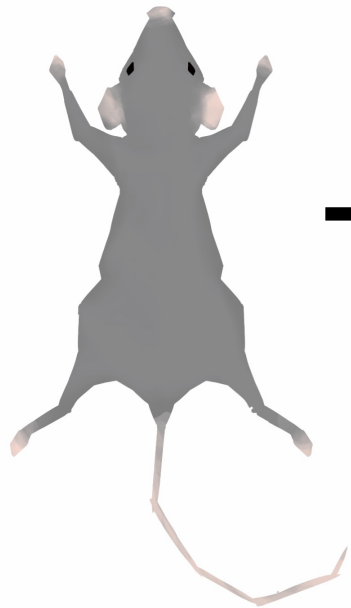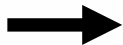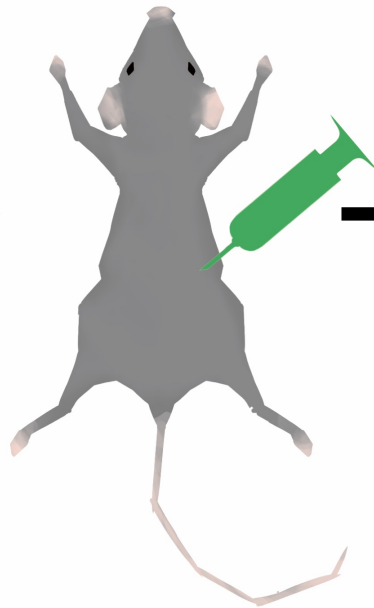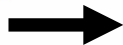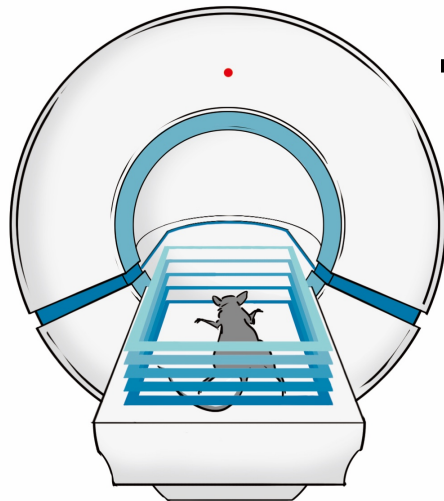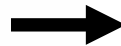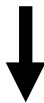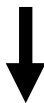

Supplement: f1 [file 3612027.f1.pdf]
