# Supplementary material for: In Vivo6-([18F]Fluoroacetamido)-1-hexanoicanilide PET Imaging of Altered Histone Deacetylase Activity in Chemotherapy-Induced Neurotoxicity
Source: Hindawi journal article supplement (doi:10.1155/2018/3612027), 2018-01-01

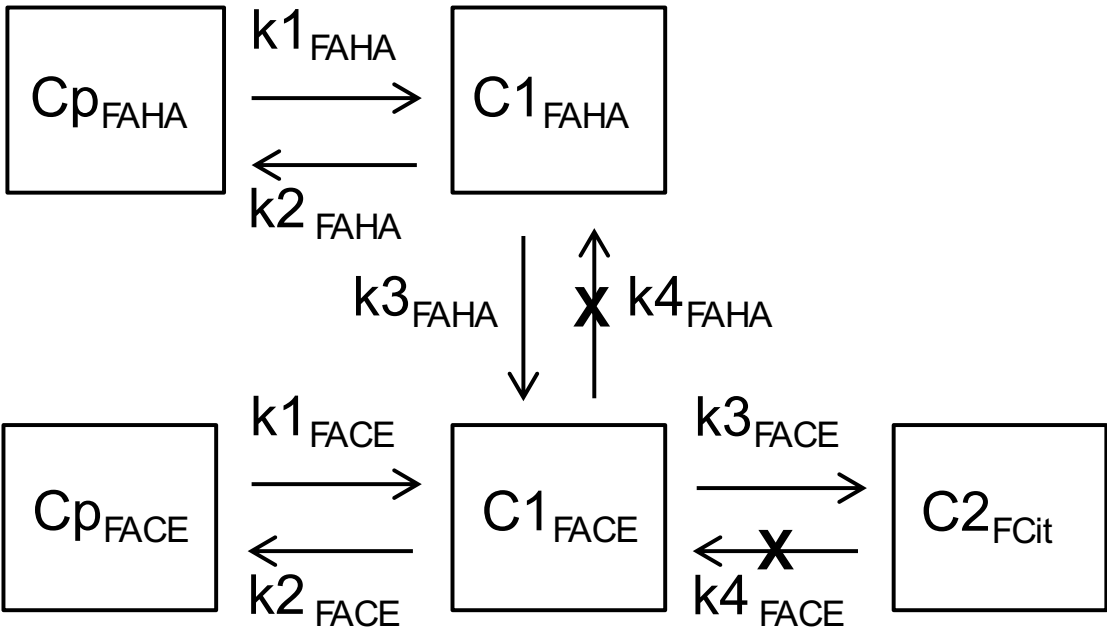

Supplement: f2 [file 3612027.f2.pdf]
